# Supplementary material for: Influenza A Virus–Host Protein Interactions Control Viral Pathogenesis
Source: Int J Mol Sci. 2017 Aug 1;18(8):1673. doi: 10.3390/ijms18081673 (PMC5578063; doi:10.3390/ijms18081673)
Supplement: Supplementary file 1 [file ijms-18-01673-s001.xlsx]

## Sheet: Sheet1
Supplementary Table 1. 136 common influenza interacting host factors found in at least 3 studies.
IAV Protein	Interacting Host Factor
M2	AFG3L2	Watanabe et al. (2014)	Tripathi et al. (2015)	Heaton et al. (2016)	Wang et al. (2017)
PB2	AKAP8	Watanabe et al. (2014)	Tripathi et al. (2015)	Heaton et al. (2016)	Wang et al. (2017)
PB1	DNAJC7	Watanabe et al. (2014)	Tripathi et al. (2015)	Heaton et al. (2016)	Wang et al. (2017)
M2	NUP205	Watanabe et al. (2014)	Tripathi et al. (2015)	Heaton et al. (2016)	Wang et al. (2017)
NA	PDIA4	Watanabe et al. (2014)	Tripathi et al. (2015)	Heaton et al. (2016)	Wang et al. (2017)
M2	SPTLC1	Watanabe et al. (2014)	Tripathi et al. (2015)	Heaton et al. (2016)	Wang et al. (2017)
M2	TRAPPC5	Watanabe et al. (2014)	Tripathi et al. (2015)	Heaton et al. (2016)	Wang et al. (2017)
M2	TRAPPC9	Watanabe et al. (2014)	Tripathi et al. (2015)	Heaton et al. (2016)	Wang et al. (2017)
PB2	UBR5	Watanabe et al. (2014)	Tripathi et al. (2015)	Heaton et al. (2016)	Wang et al. (2017)
HA	EEF1G	Watanabe et al. (2014)	Tripathi et al. (2015)	Heaton et al. (2016)
HA	SLC25A6	Watanabe et al. (2014)	Tripathi et al. (2015)	Heaton et al. (2016)
HA	ARF1	Watanabe et al. (2014)	Tripathi et al. (2015)	Heaton et al. (2016)
HA	ARF4	Watanabe et al. (2014)	Tripathi et al. (2015)	Heaton et al. (2016)
M2	NUP160	Watanabe et al. (2014)	Tripathi et al. (2015)	Heaton et al. (2016)
NA	COPB2	Watanabe et al. (2014)	Tripathi et al. (2015)	Heaton et al. (2016)
NA	CANX	Watanabe et al. (2014)	Tripathi et al. (2015)	Heaton et al. (2016)
NA	SDF2L1	Watanabe et al. (2014)	Tripathi et al. (2015)	Heaton et al. (2016)
NS1	RPS19	Watanabe et al. (2014)	Tripathi et al. (2015)	Heaton et al. (2016)
PB1	BAG2	Watanabe et al. (2014)	Tripathi et al. (2015)	Heaton et al. (2016)
PB1	HSPB1	Watanabe et al. (2014)	Tripathi et al. (2015)	Heaton et al. (2016)
PB1	PSMC4	Watanabe et al. (2014)	Tripathi et al. (2015)	Heaton et al. (2016)
PB1	PSMD11	Watanabe et al. (2014)	Tripathi et al. (2015)	Heaton et al. (2016)
PB1	PSMD3	Watanabe et al. (2014)	Tripathi et al. (2015)	Heaton et al. (2016)
PB1	RPS17	Watanabe et al. (2014)	Tripathi et al. (2015)	Heaton et al. (2016)
PB1	RPS9	Watanabe et al. (2014)	Tripathi et al. (2015)	Heaton et al. (2016)
PB1	LMNB1	Watanabe et al. (2014)	Tripathi et al. (2015)	Heaton et al. (2016)
PB1	NAP1L4	Watanabe et al. (2014)	Tripathi et al. (2015)	Heaton et al. (2016)
PB2	BAG2	Watanabe et al. (2014)	Tripathi et al. (2015)	Heaton et al. (2016)
PB2	CAD	Watanabe et al. (2014)	Tripathi et al. (2015)	Heaton et al. (2016)
PB2	DDX5	Watanabe et al. (2014)	Tripathi et al. (2015)	Heaton et al. (2016)
PB2	DNAJA3	Watanabe et al. (2014)	Tripathi et al. (2015)	Heaton et al. (2016)
PB2	PSMC5	Watanabe et al. (2014)	Tripathi et al. (2015)	Heaton et al. (2016)
PB2	PSMD11	Watanabe et al. (2014)	Tripathi et al. (2015)	Heaton et al. (2016)
PB2	PSMD12	Watanabe et al. (2014)	Tripathi et al. (2015)	Heaton et al. (2016)
PB2	PSMD13	Watanabe et al. (2014)	Tripathi et al. (2015)	Heaton et al. (2016)
PB2	PSMD2	Watanabe et al. (2014)	Tripathi et al. (2015)	Heaton et al. (2016)
PB2	PSMD3	Watanabe et al. (2014)	Tripathi et al. (2015)	Heaton et al. (2016)
PB2	PSMD6	Watanabe et al. (2014)	Tripathi et al. (2015)	Heaton et al. (2016)
M2	TIMM50	Watanabe et al. (2014)	Tripathi et al. (2015)	Heaton et al. (2016)
M2	ATP2A2	Watanabe et al. (2014)	Tripathi et al. (2015)	Heaton et al. (2016)
M2	IPO4	Watanabe et al. (2014)	Tripathi et al. (2015)	Heaton et al. (2016)
M2	PFKP	Watanabe et al. (2014)	Tripathi et al. (2015)	Heaton et al. (2016)
M2	STRAP	Watanabe et al. (2014)	Tripathi et al. (2015)	Heaton et al. (2016)
M2	LARS	Watanabe et al. (2014)	Tripathi et al. (2015)	Heaton et al. (2016)
M2	RARS	Watanabe et al. (2014)	Tripathi et al. (2015)	Heaton et al. (2016)
M2	THOC2	Watanabe et al. (2014)	Tripathi et al. (2015)	Heaton et al. (2016)
M2	ACSL3	Watanabe et al. (2014)	Tripathi et al. (2015)	Heaton et al. (2016)
M2	MDN1	Watanabe et al. (2014)	Tripathi et al. (2015)	Heaton et al. (2016)
M2	PFKM	Watanabe et al. (2014)	Tripathi et al. (2015)	Heaton et al. (2016)
M2	TBRG4	Watanabe et al. (2014)	Tripathi et al. (2015)	Heaton et al. (2016)
M2	TRAPPC6B	Watanabe et al. (2014)	Tripathi et al. (2015)	Heaton et al. (2016)
M2	ZWILCH	Watanabe et al. (2014)	Tripathi et al. (2015)	Heaton et al. (2016)
HA	HLA-B	Watanabe et al. (2014)	Tripathi et al. (2015)		Wang et al. (2017)
M1	HSPBP1	Watanabe et al. (2014)	Tripathi et al. (2015)		Wang et al. (2017)
M1	STRN	Watanabe et al. (2014)	Tripathi et al. (2015)		Wang et al. (2017)
M2	PTPLAD1	Watanabe et al. (2014)	Tripathi et al. (2015)		Wang et al. (2017)
M2	SSR1	Watanabe et al. (2014)	Tripathi et al. (2015)		Wang et al. (2017)
M2	ATXN10	Watanabe et al. (2014)	Tripathi et al. (2015)		Wang et al. (2017)
M2	GBF1	Watanabe et al. (2014)	Tripathi et al. (2015)		Wang et al. (2017)
M2	NUP188	Watanabe et al. (2014)	Tripathi et al. (2015)		Wang et al. (2017)
M2	RANBP6	Watanabe et al. (2014)	Tripathi et al. (2015)		Wang et al. (2017)
M2	ZW10	Watanabe et al. (2014)	Tripathi et al. (2015)		Wang et al. (2017)
M2	RANBP5	Watanabe et al. (2014)	Tripathi et al. (2015)		Wang et al. (2017)
M2	DHCR7	Watanabe et al. (2014)	Tripathi et al. (2015)		Wang et al. (2017)
M2	SMC4	Watanabe et al. (2014)	Tripathi et al. (2015)		Wang et al. (2017)
M2	ALDH3A2	Watanabe et al. (2014)	Tripathi et al. (2015)		Wang et al. (2017)
M2	ARMC6	Watanabe et al. (2014)	Tripathi et al. (2015)		Wang et al. (2017)
M2	BTAF1	Watanabe et al. (2014)	Tripathi et al. (2015)		Wang et al. (2017)
M2	BZW1	Watanabe et al. (2014)	Tripathi et al. (2015)		Wang et al. (2017)
M2	BZW2	Watanabe et al. (2014)	Tripathi et al. (2015)		Wang et al. (2017)
M2	C5orf3	Watanabe et al. (2014)	Tripathi et al. (2015)		Wang et al. (2017)
M2	DDX20	Watanabe et al. (2014)	Tripathi et al. (2015)		Wang et al. (2017)
M2	EIF2B1	Watanabe et al. (2014)	Tripathi et al. (2015)		Wang et al. (2017)
M2	EIF2B2	Watanabe et al. (2014)	Tripathi et al. (2015)		Wang et al. (2017)
M2	EIF2B3	Watanabe et al. (2014)	Tripathi et al. (2015)		Wang et al. (2017)
M2	EIF2B4	Watanabe et al. (2014)	Tripathi et al. (2015)		Wang et al. (2017)
M2	EIF2B5	Watanabe et al. (2014)	Tripathi et al. (2015)		Wang et al. (2017)
M2	HEATR3	Watanabe et al. (2014)	Tripathi et al. (2015)		Wang et al. (2017)
M2	KIAA0368	Watanabe et al. (2014)	Tripathi et al. (2015)		Wang et al. (2017)
M2	NCDN	Watanabe et al. (2014)	Tripathi et al. (2015)		Wang et al. (2017)
M2	PEX19	Watanabe et al. (2014)	Tripathi et al. (2015)		Wang et al. (2017)
M2	SAAL1	Watanabe et al. (2014)	Tripathi et al. (2015)		Wang et al. (2017)
M2	THADA	Watanabe et al. (2014)	Tripathi et al. (2015)		Wang et al. (2017)
M2	TRAPPC3	Watanabe et al. (2014)	Tripathi et al. (2015)		Wang et al. (2017)
NA	UGCGL1	Watanabe et al. (2014)	Tripathi et al. (2015)		Wang et al. (2017)
NP	SFRS1	Watanabe et al. (2014)	Tripathi et al. (2015)		Wang et al. (2017)
NP	SFRS3	Watanabe et al. (2014)	Tripathi et al. (2015)		Wang et al. (2017)
NP	SRP14	Watanabe et al. (2014)	Tripathi et al. (2015)		Wang et al. (2017)
NP	SNRP70	Watanabe et al. (2014)	Tripathi et al. (2015)		Wang et al. (2017)
NP	SNRPA	Watanabe et al. (2014)	Tripathi et al. (2015)		Wang et al. (2017)
NP	LARP1	Watanabe et al. (2014)	Tripathi et al. (2015)		Wang et al. (2017)
NP	DAP3	Watanabe et al. (2014)	Tripathi et al. (2015)		Wang et al. (2017)
NP	RALY	Watanabe et al. (2014)	Tripathi et al. (2015)		Wang et al. (2017)
NP	UPF1	Watanabe et al. (2014)	Tripathi et al. (2015)		Wang et al. (2017)
NP	SNRPA1	Watanabe et al. (2014)	Tripathi et al. (2015)		Wang et al. (2017)
NP	SNRPC	Watanabe et al. (2014)	Tripathi et al. (2015)		Wang et al. (2017)
NP	PTCD3	Watanabe et al. (2014)	Tripathi et al. (2015)		Wang et al. (2017)
NP	PURA	Watanabe et al. (2014)	Tripathi et al. (2015)		Wang et al. (2017)
NP	BCDIN3	Watanabe et al. (2014)	Tripathi et al. (2015)		Wang et al. (2017)
NP	KPNA6	Watanabe et al. (2014)	Tripathi et al. (2015)		Wang et al. (2017)
NP	LARP7	Watanabe et al. (2014)	Tripathi et al. (2015)		Wang et al. (2017)
NP	MOV10	Watanabe et al. (2014)	Tripathi et al. (2015)		Wang et al. (2017)
NP	NCBP1	Watanabe et al. (2014)	Tripathi et al. (2015)		Wang et al. (2017)
NP	NCBP2	Watanabe et al. (2014)	Tripathi et al. (2015)		Wang et al. (2017)
NP	PHAX	Watanabe et al. (2014)	Tripathi et al. (2015)		Wang et al. (2017)
NP	TRA2A	Watanabe et al. (2014)	Tripathi et al. (2015)		Wang et al. (2017)
NS1	SNW1	Watanabe et al. (2014)	Tripathi et al. (2015)		Wang et al. (2017)
NS2	OCIAD1	Watanabe et al. (2014)	Tripathi et al. (2015)		Wang et al. (2017)
PB1	UBR5	Watanabe et al. (2014)	Tripathi et al. (2015)		Wang et al. (2017)
PB1	PPP6C	Watanabe et al. (2014)	Tripathi et al. (2015)		Wang et al. (2017)
PB1	SAPS3	Watanabe et al. (2014)	Tripathi et al. (2015)		Wang et al. (2017)
PB1	RANBP5	Watanabe et al. (2014)	Tripathi et al. (2015)		Wang et al. (2017)
PB2	ANGEL1	Watanabe et al. (2014)	Tripathi et al. (2015)		Wang et al. (2017)
PB2	CALU	Watanabe et al. (2014)	Tripathi et al. (2015)		Wang et al. (2017)
PB2	DNAJB6	Watanabe et al. (2014)	Tripathi et al. (2015)		Wang et al. (2017)
PB2	KPNA4	Watanabe et al. (2014)	Tripathi et al. (2015)		Wang et al. (2017)
PB2	RCN1	Watanabe et al. (2014)	Tripathi et al. (2015)		Wang et al. (2017)
PB2	SDF4	Watanabe et al. (2014)	Tripathi et al. (2015)		Wang et al. (2017)
PB2	TCF25	Watanabe et al. (2014)	Tripathi et al. (2015)		Wang et al. (2017)
M2	GANAB	Watanabe et al. (2014)		Heaton et al. (2016)	Wang et al. (2017)
M2	SLC3A2	Watanabe et al. (2014)		Heaton et al. (2016)	Wang et al. (2017)
M2	HADHB	Watanabe et al. (2014)		Heaton et al. (2016)	Wang et al. (2017)
M2	PLD3	Watanabe et al. (2014)		Heaton et al. (2016)	Wang et al. (2017)
M2	NUP107	Watanabe et al. (2014)		Heaton et al. (2016)	Wang et al. (2017)
M2	TMPO	Watanabe et al. (2014)		Heaton et al. (2016)	Wang et al. (2017)
NA	RBMX	Watanabe et al. (2014)		Heaton et al. (2016)	Wang et al. (2017)
NS1	FAM120A	Watanabe et al. (2014)		Heaton et al. (2016)	Wang et al. (2017)
PB2	MLF2	Watanabe et al. (2014)		Heaton et al. (2016)	Wang et al. (2017)
HA	SLC25A1		Tripathi et al. (2015)	Heaton et al. (2016)	Wang et al. (2017)
M2	TRAPPC10		Tripathi et al. (2015)	Heaton et al. (2016)	Wang et al. (2017)
M2	QSOX2		Tripathi et al. (2015)	Heaton et al. (2016)	Wang et al. (2017)
NA	CLGN		Tripathi et al. (2015)	Heaton et al. (2016)	Wang et al. (2017)
NA	ATXN10		Tripathi et al. (2015)	Heaton et al. (2016)	Wang et al. (2017)
PB1	CALU		Tripathi et al. (2015)	Heaton et al. (2016)	Wang et al. (2017)
PB1	BAG5		Tripathi et al. (2015)	Heaton et al. (2016)	Wang et al. (2017)
PB1	POLR2B		Tripathi et al. (2015)	Heaton et al. (2016)	Wang et al. (2017)
